# Supplementary material for: Targeting the insulin-like growth factor receptor and Src signaling network for the treatment of non-small cell lung cancer
Source: Springer Nature journal article supplement (doi:10.1186/s12943-015-0392-3), 2015-06-04

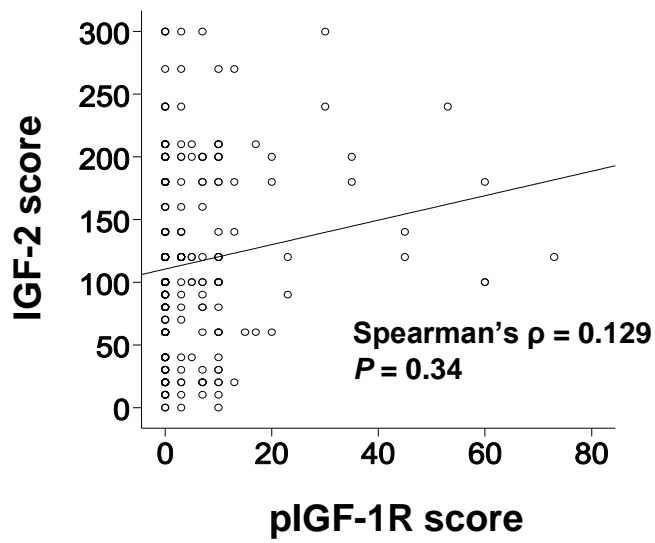

Supplement: MOESM1 [file 9763128]
