# Supplementary material for: Targeting the insulin-like growth factor receptor and Src signaling network for the treatment of non-small cell lung cancer
Source: Springer Nature journal article supplement (doi:10.1186/s12943-015-0392-3), 2015-06-04
Supplement: MOESM3 [file 9763128]

|        | Adenocarcinoma |       |       |      |      |        | Squamous cell carcinoma |       |        |      |       | Large cell carcinoma |      |
|--------|----------------|-------|-------|------|------|--------|-------------------------|-------|--------|------|-------|----------------------|------|
|        | A549           | H1944 | H1975 | H292 | H522 | HCC827 | Calu-1                  | H226B | H226Br | H520 | HCC15 | H1299                | H460 |
| EGFR   | WT             | WT    | Mut   | WT   | WT   | Mut    | WT                      | WT    | WT     | UD   | WT    | WT                   | WT   |
| K-Ras  | Mut            | Mut   | WT    | WT   | WT   | WT     | Mut                     | WT    | Mut    | WT   | WT    | WT                   | Mut  |
| p53    | WT             | WT    | Mut   | WT   | Mut  | WT     | WT                      | WT    | Mut    | Mut  | Mut   | Nu                   | WT   |
| PTEN   | WT             | U     | WT    | WT   | WT   | WT     | WT                      | U     | U      | WT   | WT    | Nu                   | WT   |
| PI3KCA | WT             | U     | Mut   | WT   | WT   | Mut    | WT                      | WT    | U      | WT   | WT    | WT                   | Mut  |
| LKB1   | Mut            | WT    | WT    | WT   | WT   | WT     | WT                      | WT    | U      | WT   | Mut   | WT                   | Mut  |
| B-Raf  | WT             | U     | WT    | WT   | WT   | U      | WT                      | WT    | U      | WT   | WT    | WT                   | WT   |

WT: wild type    Mut: mutant type    Nu: null    U: unknown    UD: undetectable
