# Supplementary material for: Targeting the insulin-like growth factor receptor and Src signaling network for the treatment of non-small cell lung cancer
Source: Springer Nature journal article supplement (doi:10.1186/s12943-015-0392-3), 2015-06-04

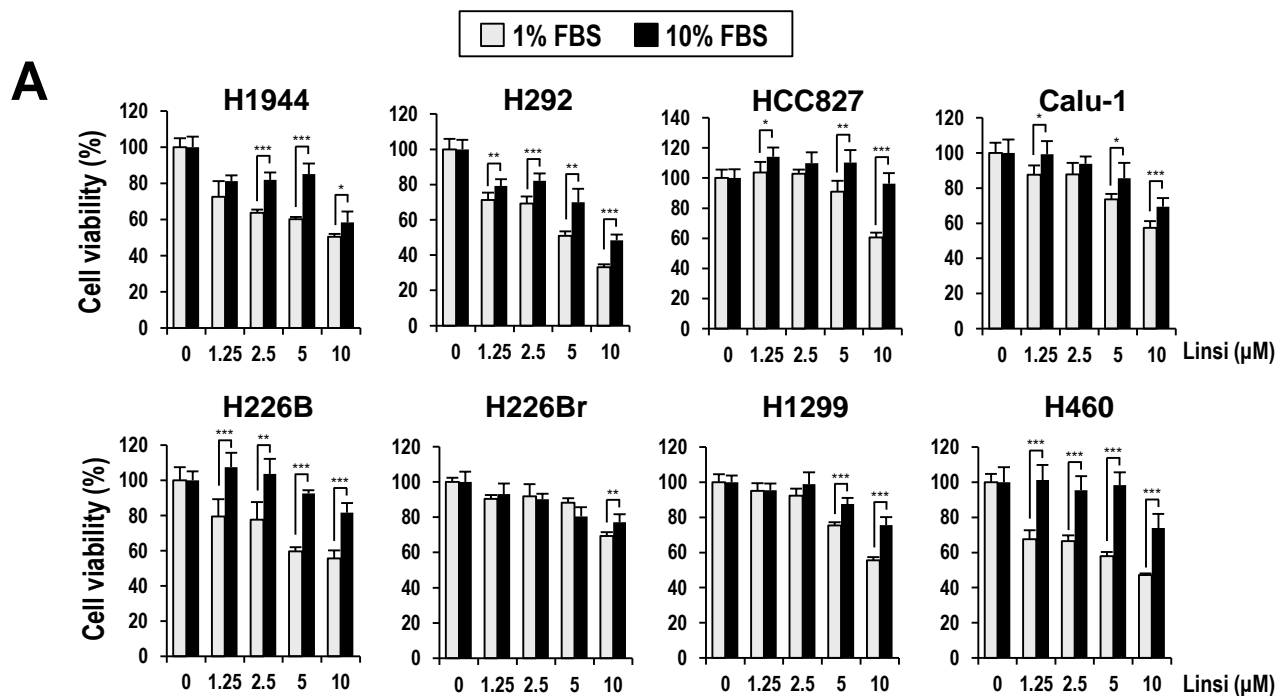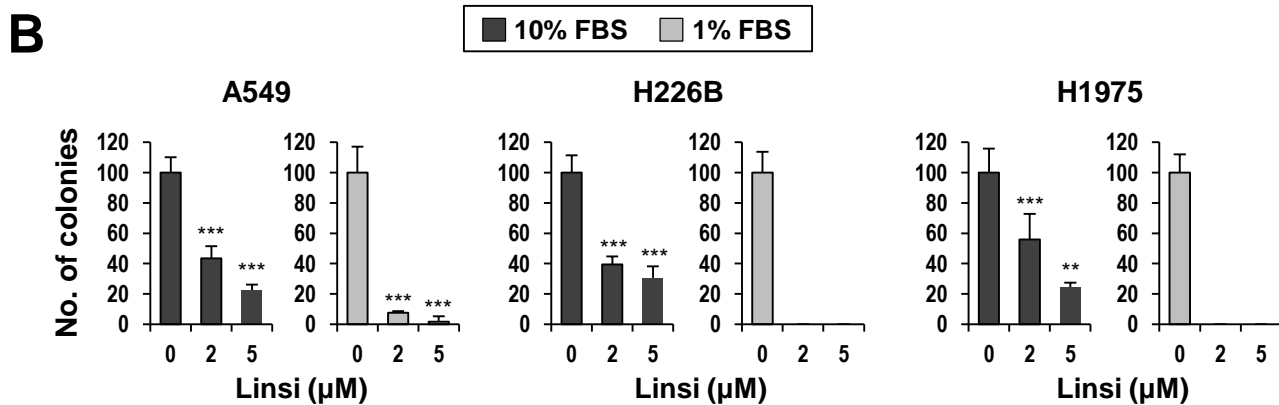

**C**

| Linsi ( $\mu\text{M}$ ) | 10% FBS |      |      | 1% FBS |      |      |
|-------------------------|---------|------|------|--------|------|------|
|                         | 0       | 2    | 5    | 0      | 2    | 5    |
| G0/G1                   | 64.4    | 69.5 | 73.3 | 74.3   | 74.2 | 72.5 |
| S                       | 14.8    | 13.2 | 10.7 | 11.7   | 9.4  | 7.1  |
| G2/M                    | 13.5    | 10.8 | 7.5  | 9.5    | 7.8  | 5.4  |
| subG1                   | 6.9     | 6.6  | 8.6  | 4.4    | 8.6  | 15.2 |

  

| Linsi ( $\mu\text{M}$ ) | 10% FBS |      |      | 1% FBS |      |      |
|-------------------------|---------|------|------|--------|------|------|
|                         | 0       | 2    | 5    | 0      | 2    | 5    |
| G0/G1                   | 62.6    | 58.0 | 56.2 | 61.5   | 52.2 | 42.4 |
| S                       | 7.7     | 9.4  | 9.4  | 6.3    | 9.5  | 10.6 |
| G2/M                    | 20.8    | 17.9 | 14.8 | 17.3   | 21.2 | 18.3 |
| subG1                   | 7.9     | 13.9 | 18.6 | 14.3   | 15.7 | 27.6 |

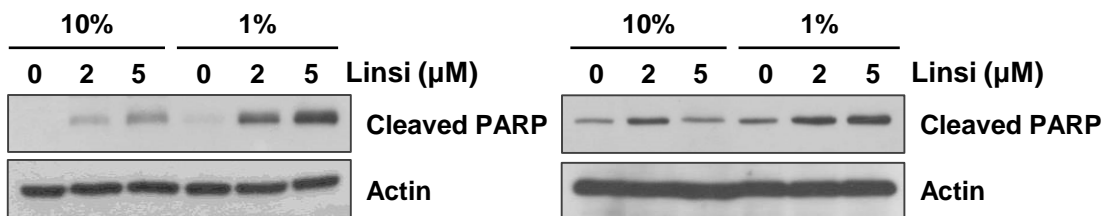

Supplement: MOESM15 [file 9763128]
